# Supplementary material for: (±)-Rhytidhymarins A and B, two pairs of new isocoumarin derivatives from endophytic fungus Rhytidhysteron sp. BZM-9
Source: Royal Society of Chemistry journal article supplement (doi:10.1039/d1nj01993g), 2021-01-01

(±)-Rhytidhymarins A and B, two pairs of new  
isocoumarin derivatives from endophytic fungus

*Rhytidhysterone* sp. BZM-9

Sha Zhang,<sup>a,b</sup> Feng-Hua Kang,<sup>a,b</sup> Jian-Bing Tan,<sup>a,b</sup> De-Kun Chen,<sup>a,b</sup> Min Kuang,<sup>a,b</sup> Wen-Xuan  
Wang,<sup>a,b</sup> Kang-Ping Xu,<sup>a,b</sup> Zhen-Xing Zou<sup>\*,a,b</sup>

<sup>a</sup> Xiangya School of Pharmaceutical Sciences, Central South University, Changsha 410013, China

<sup>b</sup> Hunan Key Laboratory of Diagnostic and Therapeutic Drug Research for Chronic Diseases, Changsha 410013,  
China

\*Corresponding author. *E-mail*: zouzhenxing@csu.edu.cn (Zhen-Xing Zou)

**Contents.....Page**

**Rhytidhymarin A ((±)-1)**

**Figure S1.** HRESIMS spectrum of rhytidhymarin A ((±)-1) ..... 1

**Figure S2.** <sup>1</sup>H NMR spectrum (500 MHz) of (±)-1 in CD<sub>3</sub>OD ..... 1

**Figure S3.** <sup>13</sup>C NMR spectrum (125 MHz) of (±)-1 in CD<sub>3</sub>OD ..... 2

**Figure S4.** <sup>1</sup>H-<sup>1</sup>H COSY spectrum of (±)-1 in CD<sub>3</sub>OD ..... 2

**Figure S5.** HSQC spectrum of (±)-1 in CD<sub>3</sub>OD ..... 3

**Figure S6.** HMBC spectrum of (±)-1 in CD<sub>3</sub>OD ..... 3

**Figure S7.** ROESY spectrum of (±)-1 in CD<sub>3</sub>OD ..... 4

**Figure S8.** Chiral HPLC analysis of compound (+)-1 and (-)-1 ..... 4

**Rhytidhymarin B ((±)-2)**

**Figure S9.** HRESIMS spectrum of rhytidhymarin A ((±)-2) ..... 5

**Figure S10.** <sup>1</sup>H NMR spectrum (500 MHz) of (±)-2 in CD<sub>3</sub>OD ..... 5

**Figure S11.** <sup>13</sup>C NMR spectrum (125 MHz) of (±)-2 in CD<sub>3</sub>OD ..... 6

**Figure S12.** <sup>1</sup>H-<sup>1</sup>H COSY spectrum of (±)-2 in CD<sub>3</sub>OD ..... 6

**Figure S13.** HSQC spectrum of (±)-2 in CD<sub>3</sub>OD

**Figure S14.** HMBC spectrum of (±)-2 in CD<sub>3</sub>OD ..... 7

**Figure S15.** ROESY spectrum of (±)-2 in CD<sub>3</sub>OD ..... 7

**Figure S16.** Chiral HPLC analysis of compound (+)-2 and (-)-2 ..... 8

**Rhytidhyster A (3)**

**Figure S17.** HRESIMS spectrum of rhytidhymarin A (3) ..... 8

**Figure S18.** <sup>1</sup>H NMR spectrum (400 MHz) of 3 in DMSO-*d*<sub>6</sub> ..... 9

**Figure S19.** <sup>13</sup>C NMR spectrum (100 MHz) of 3 in DMSO-*d*<sub>6</sub> ..... 9

**Figure S20.** <sup>1</sup>H-<sup>1</sup>H COSY spectrum of 3 in DMSO-*d*<sub>6</sub> ..... 10

**Figure S21.** HSQC spectrum of 3 in DMSO-*d*<sub>6</sub> ..... 10

**Figure S22.** HMBC spectrum of 3 in DMSO-*d*<sub>6</sub> ..... 11

**Figure S23.** NOESY spectrum of 3 in DMSO-*d*<sub>6</sub> ..... 11

**Figure S1.** HRESIMS spectrum of rhytidhymarin A ((±)-1)

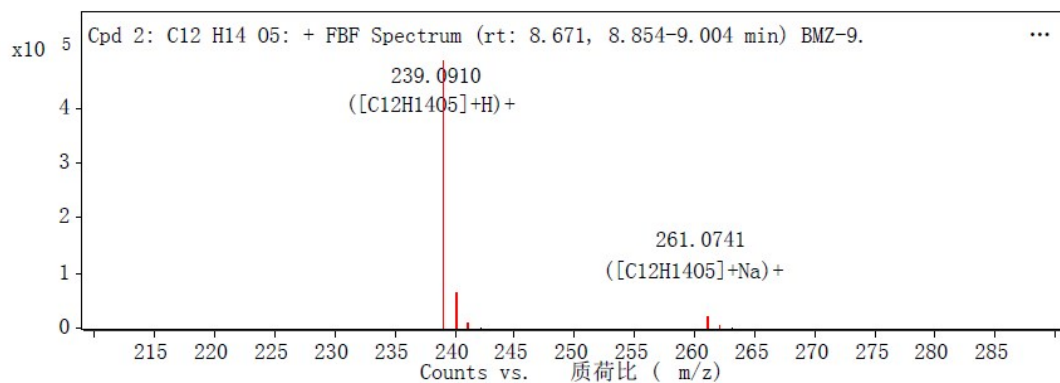

**Figure S2.** <sup>1</sup>H NMR spectrum (500 MHz) of ((±)-1) in CD<sub>3</sub>OD

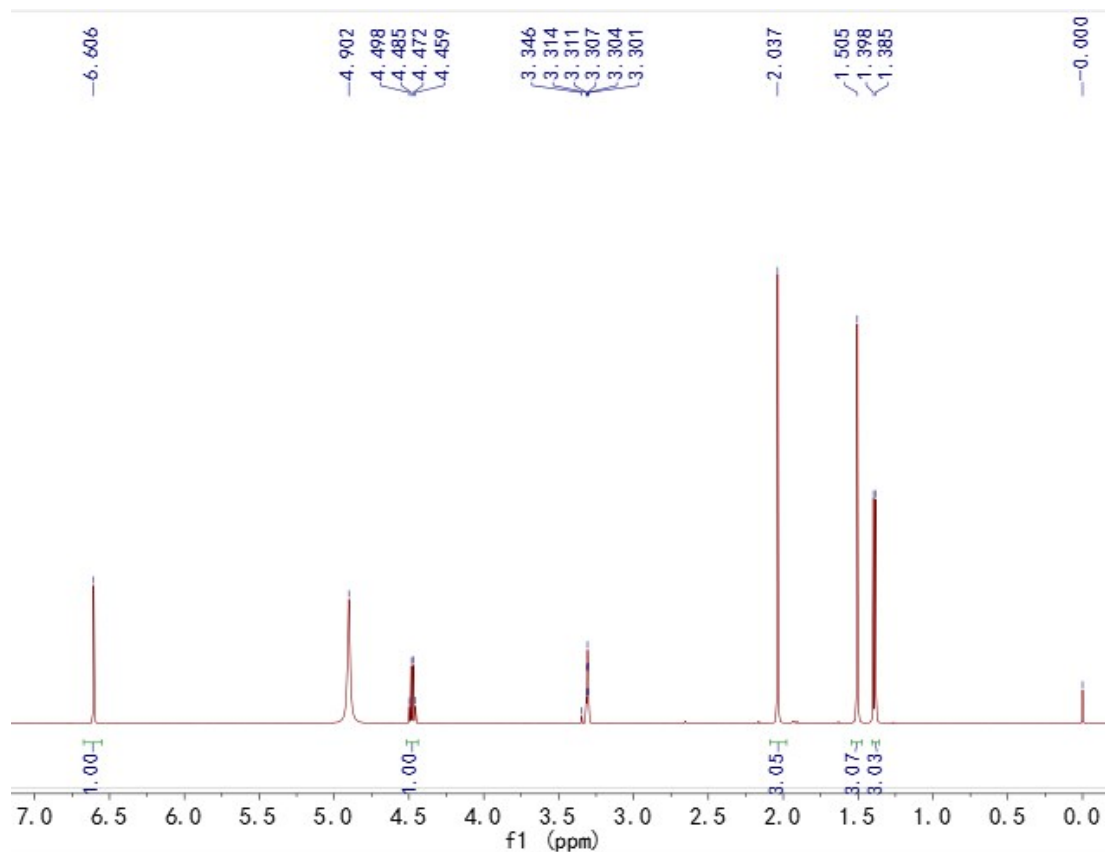

**Figure S3.**  $^{13}\text{C}$  NMR spectrum (125 MHz) of ( $\pm$ )-**1** in  $\text{CD}_3\text{OD}$

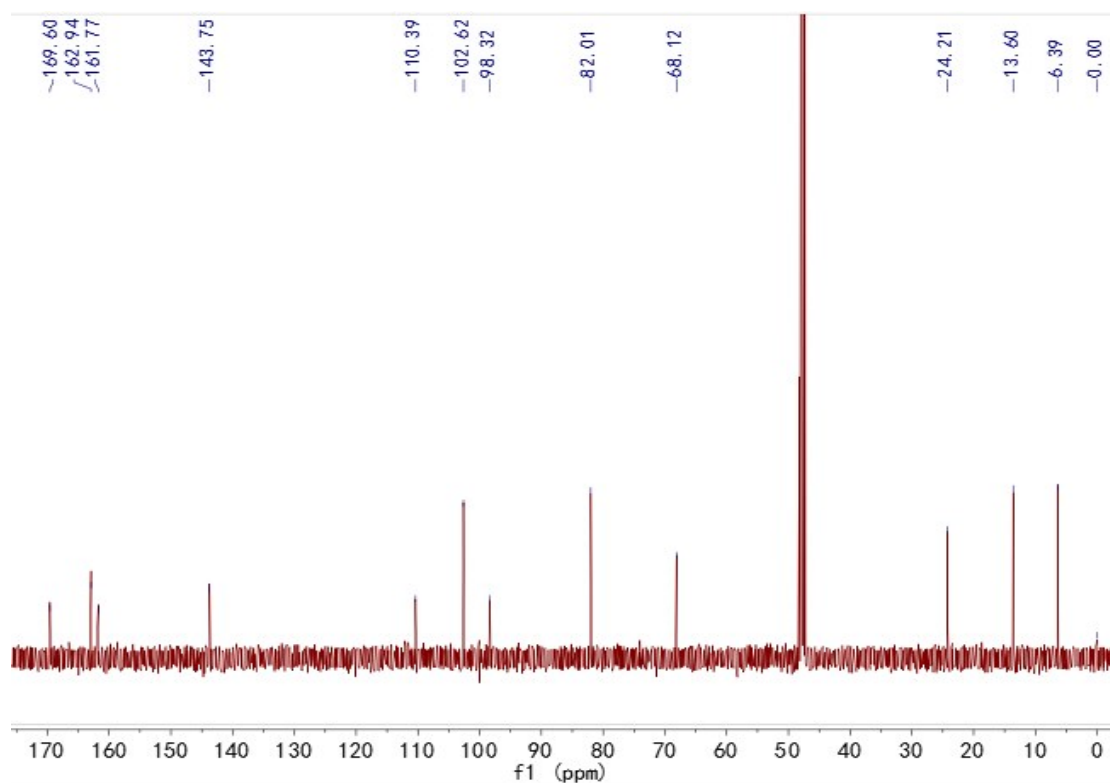

**Figure S4.**  $^1\text{H}$ - $^1\text{H}$  COSY spectrum of ( $\pm$ )-**1** in  $\text{CD}_3\text{OD}$

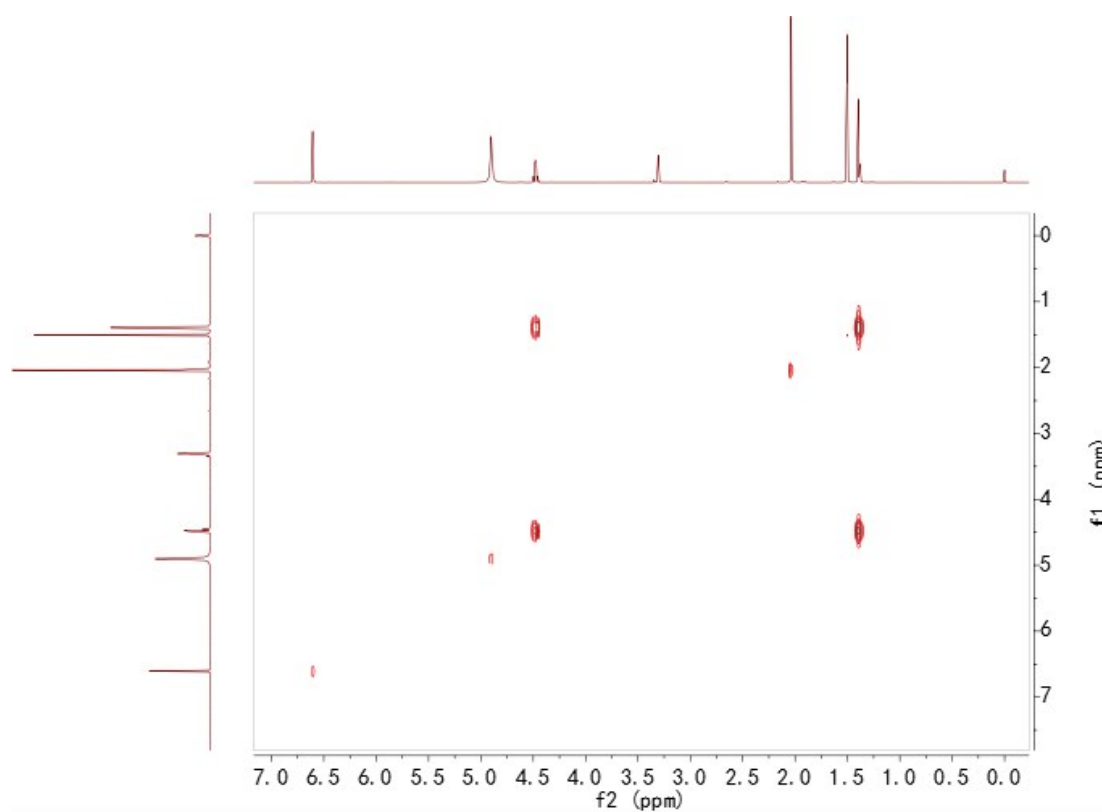

**Figure S5.** HSQC spectrum of ( $\pm$ )-**1** in CD<sub>3</sub>OD

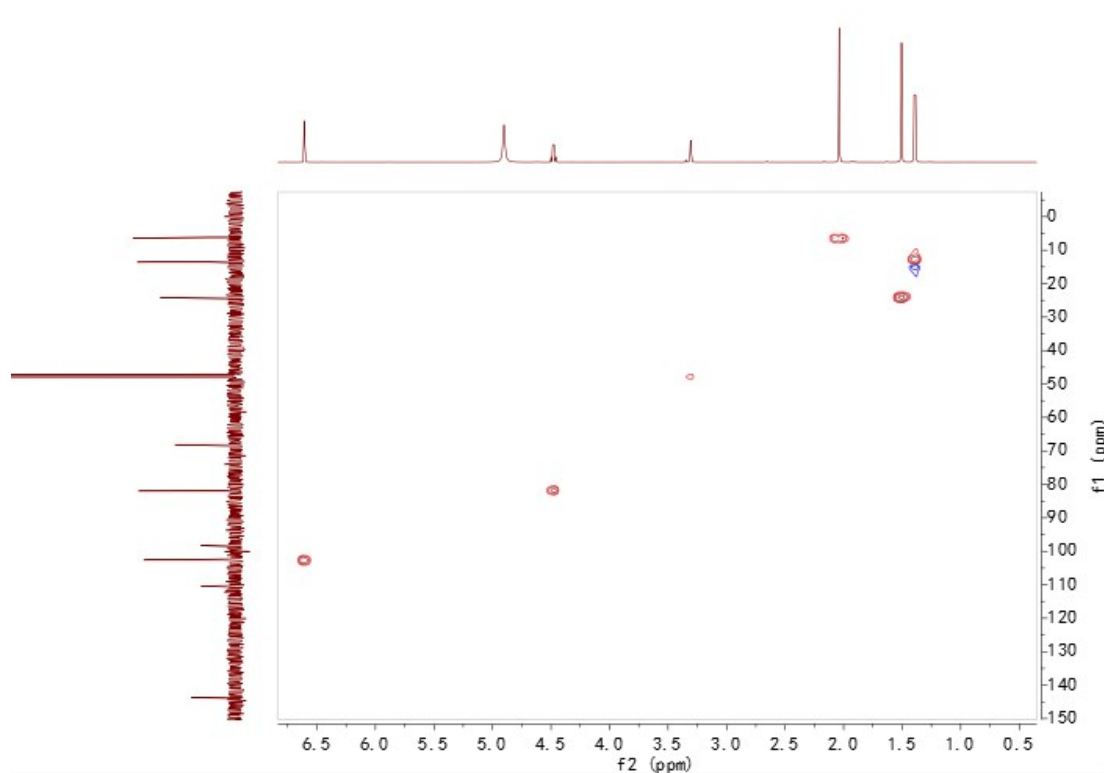

**Figure S6.** HMBC spectrum of ( $\pm$ )-**1** in CD<sub>3</sub>OD

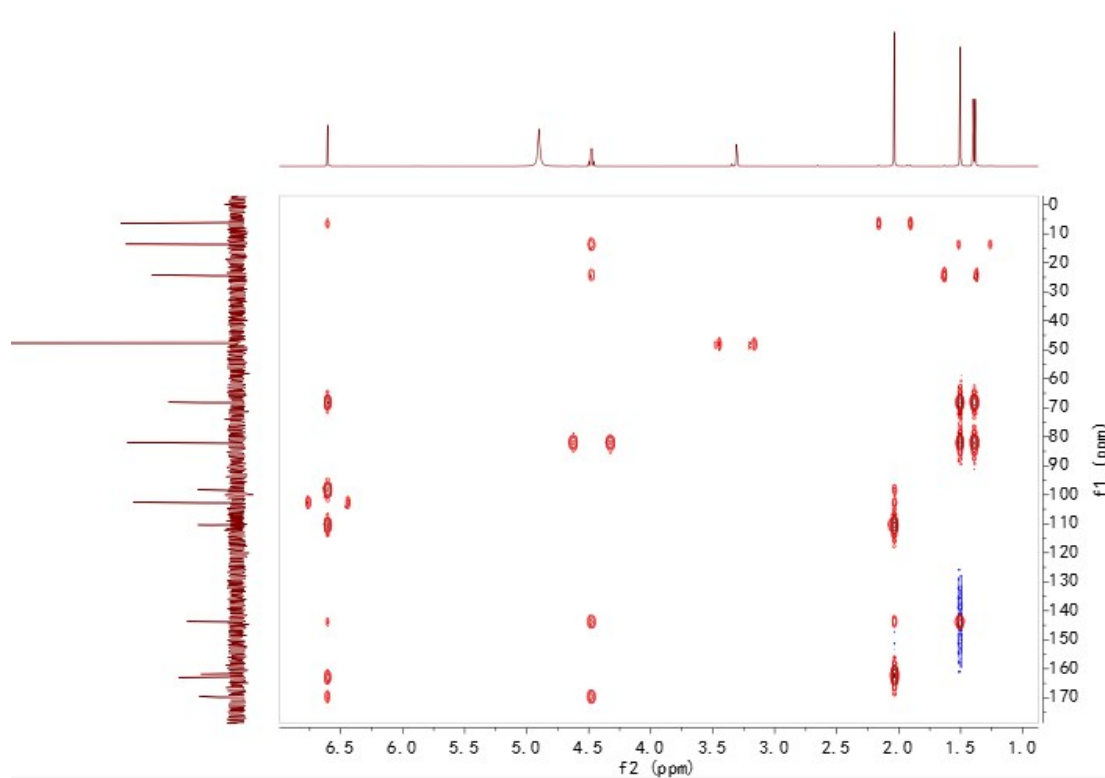

**Figure S7.** ROESY spectrum of ( $\pm$ )-**1** in CD<sub>3</sub>OD

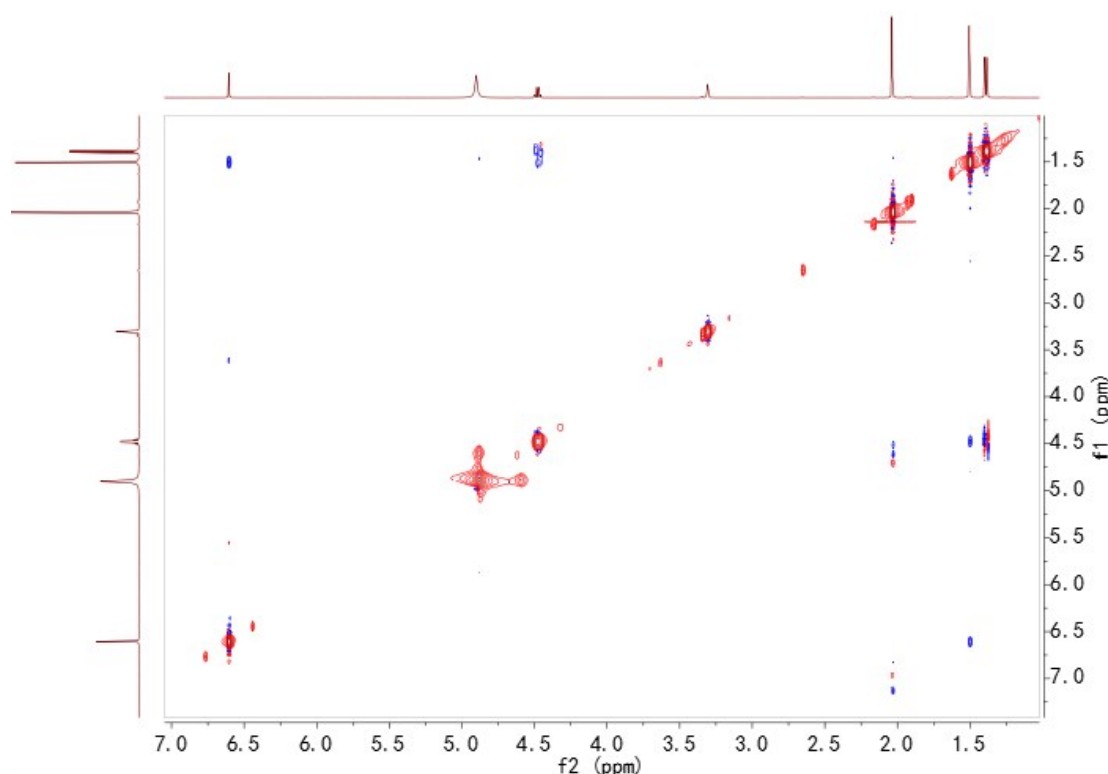

**Figure S8.** Chiral HPLC analysis of compound (+)-**1** and (-)-**1**

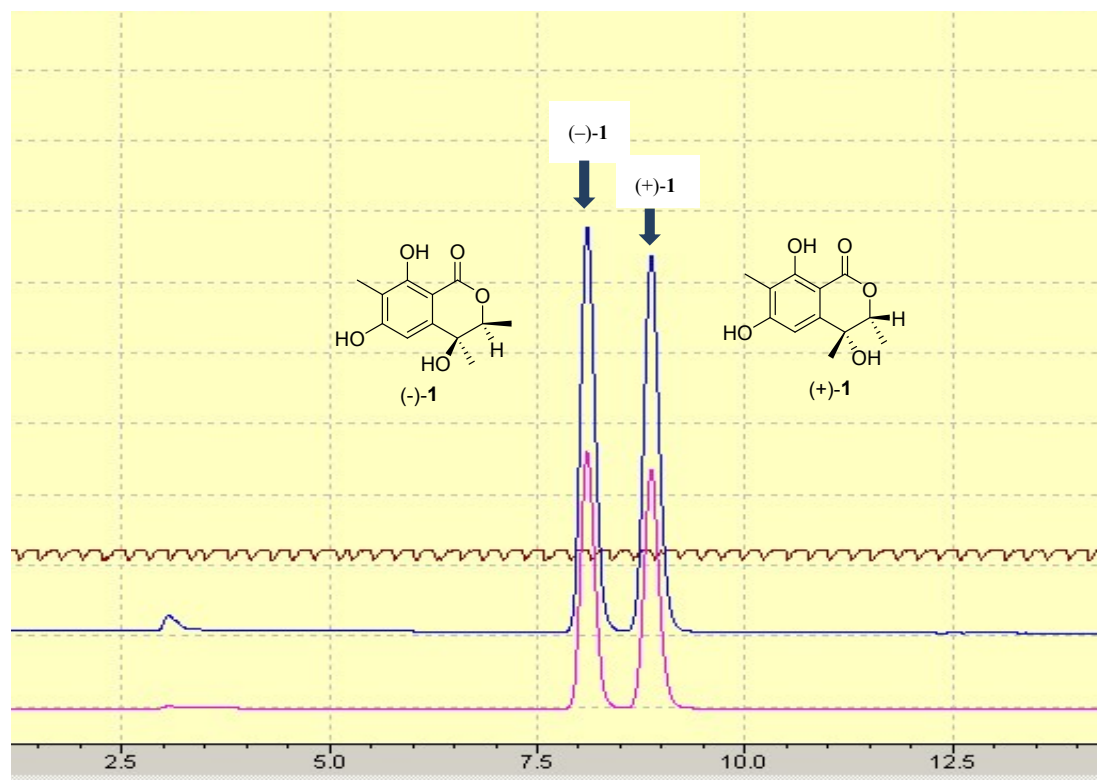

**Figure S9.** HRESIMS spectrum of rhytidhymarin A ((±)-2)

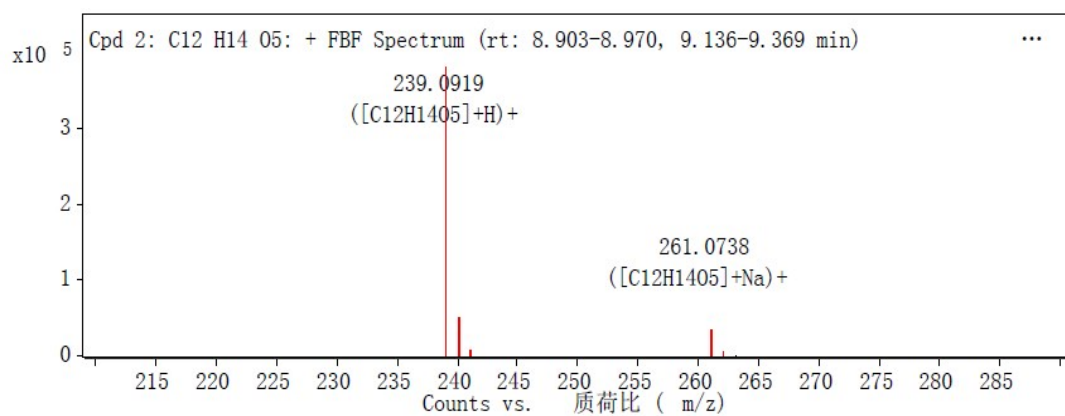

**Figure S10.** <sup>1</sup>H NMR spectrum (500 MHz) of ((±)-2 in CD<sub>3</sub>OD

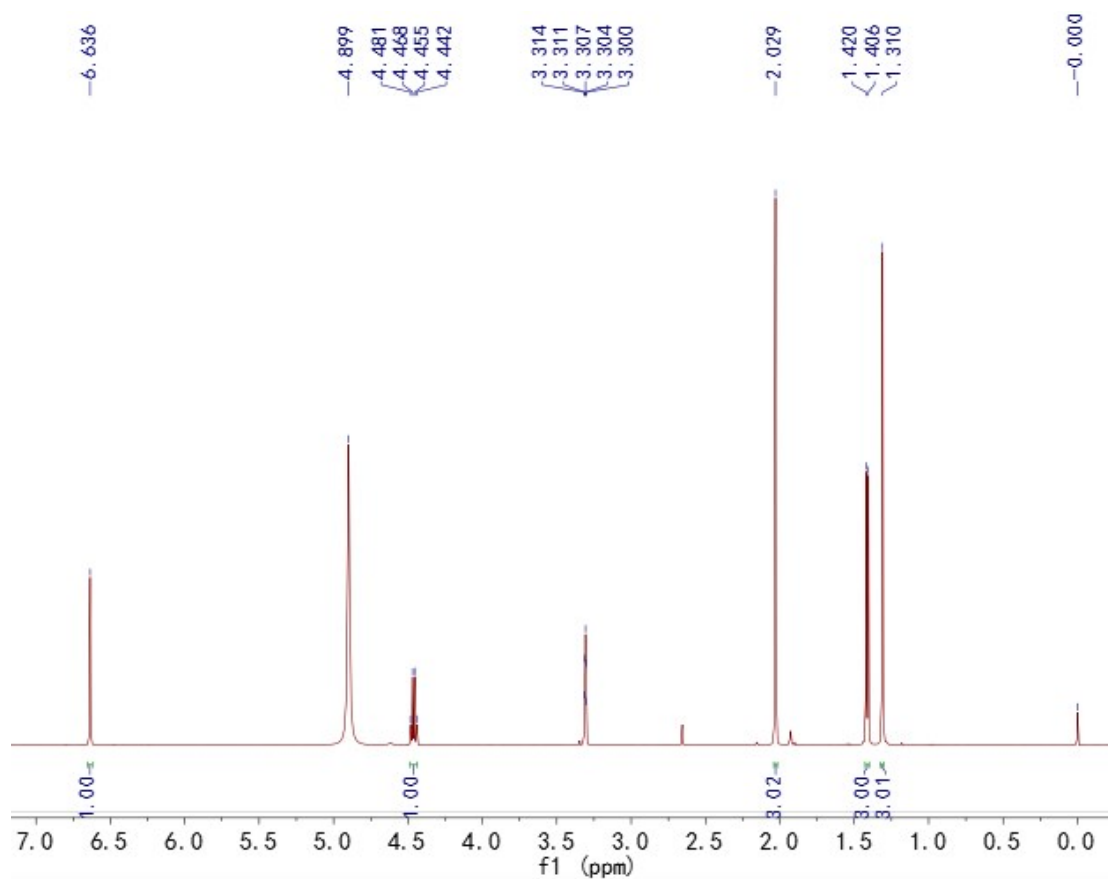

**Figure S11.**  $^{13}\text{C}$  NMR spectrum (125 MHz) of ( $\pm$ )-**2** in  $\text{CD}_3\text{OD}$

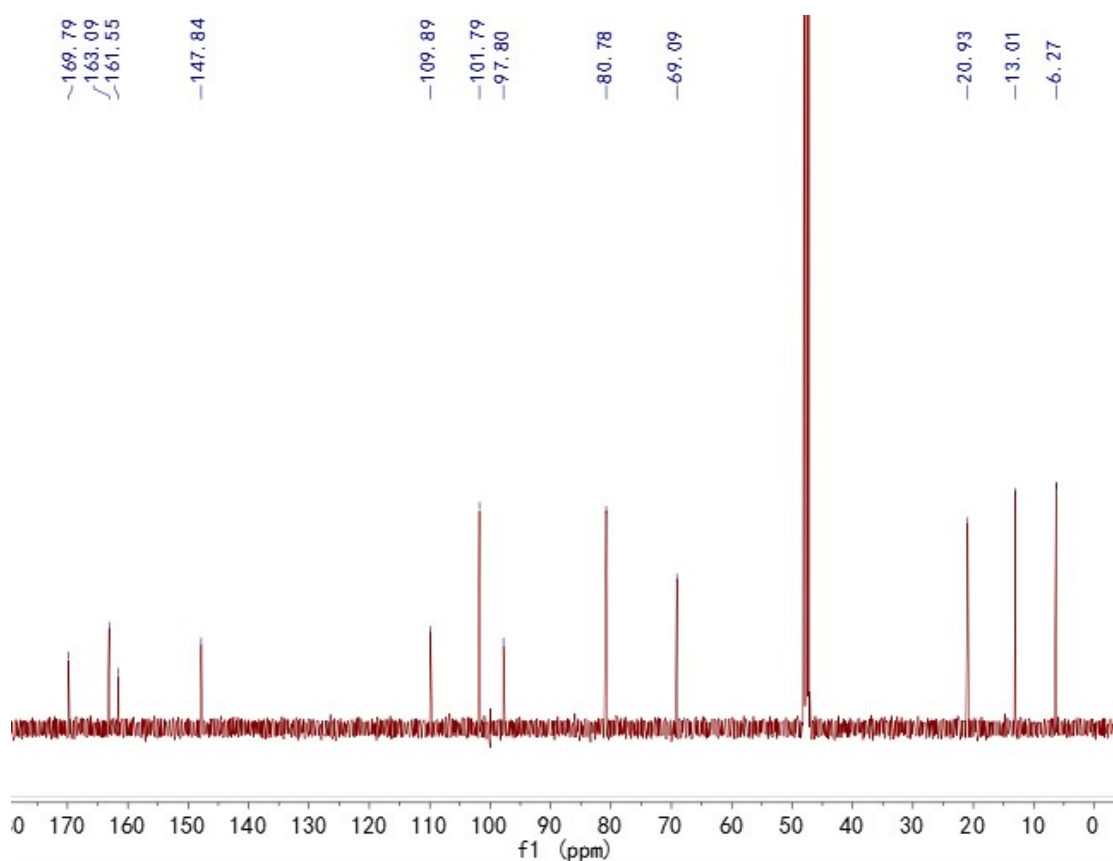

**Figure S12.**  $^1\text{H}$ - $^1\text{H}$  COSY spectrum of ( $\pm$ )-**2** in  $\text{CD}_3\text{OD}$

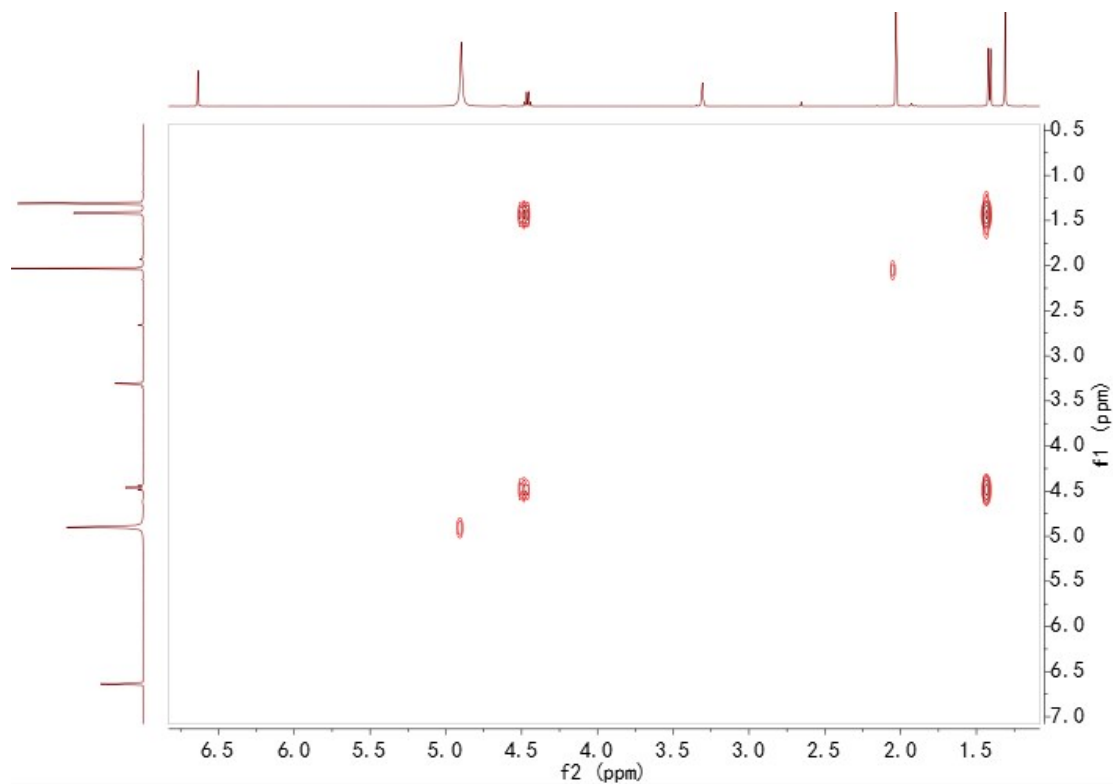



**Figure S13.** HSQC spectrum of ( $\pm$ )-**2** in CD<sub>3</sub>OD

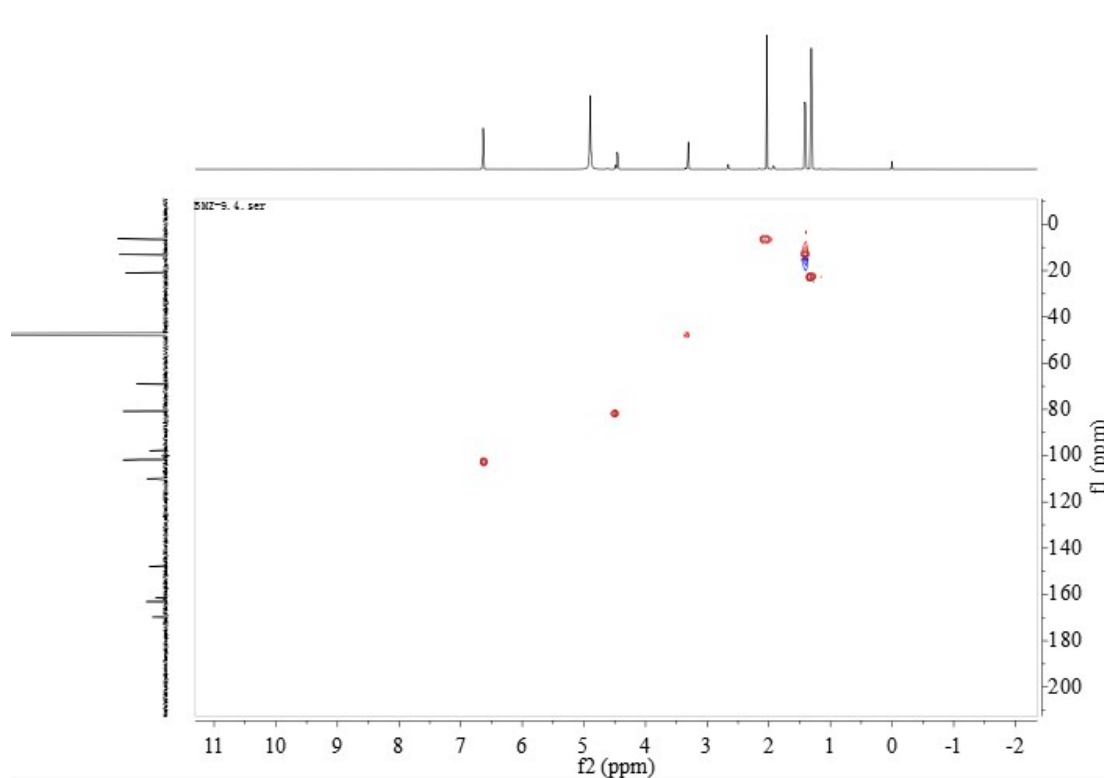

**Figure S14.** HMBC spectrum of ( $\pm$ )-**2** in CD<sub>3</sub>OD

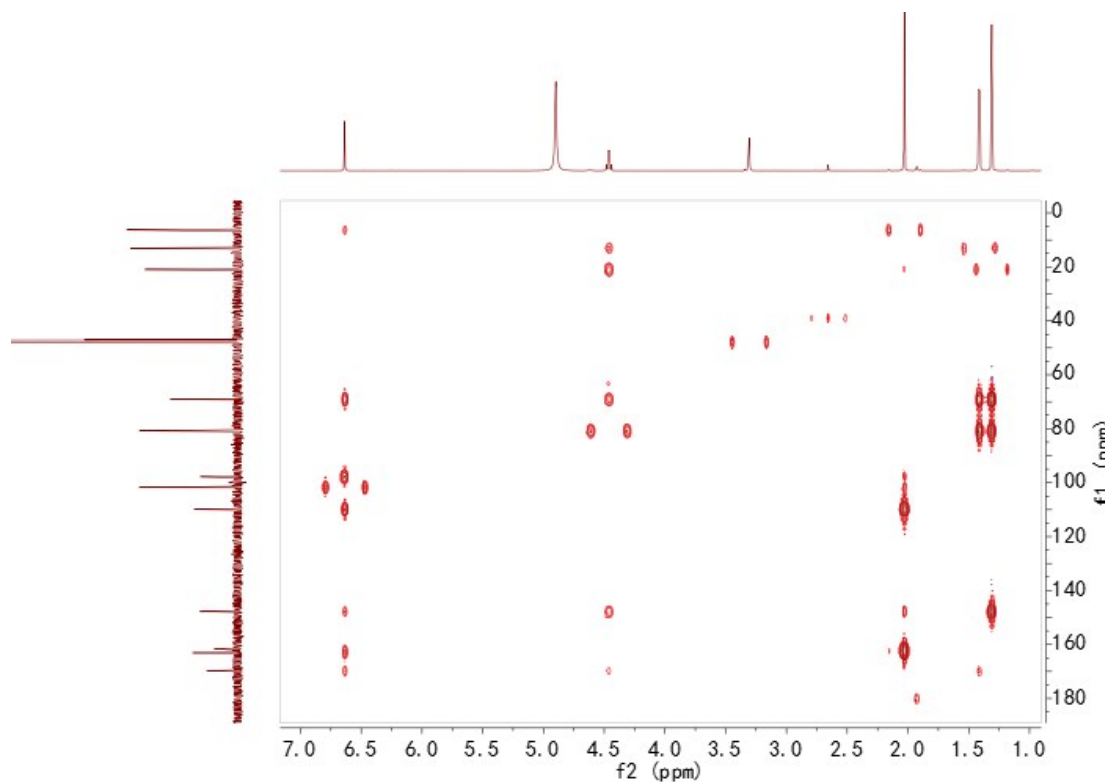

**Figure S15.** ROESY spectrum of ( $\pm$ )-**2** in CD<sub>3</sub>OD

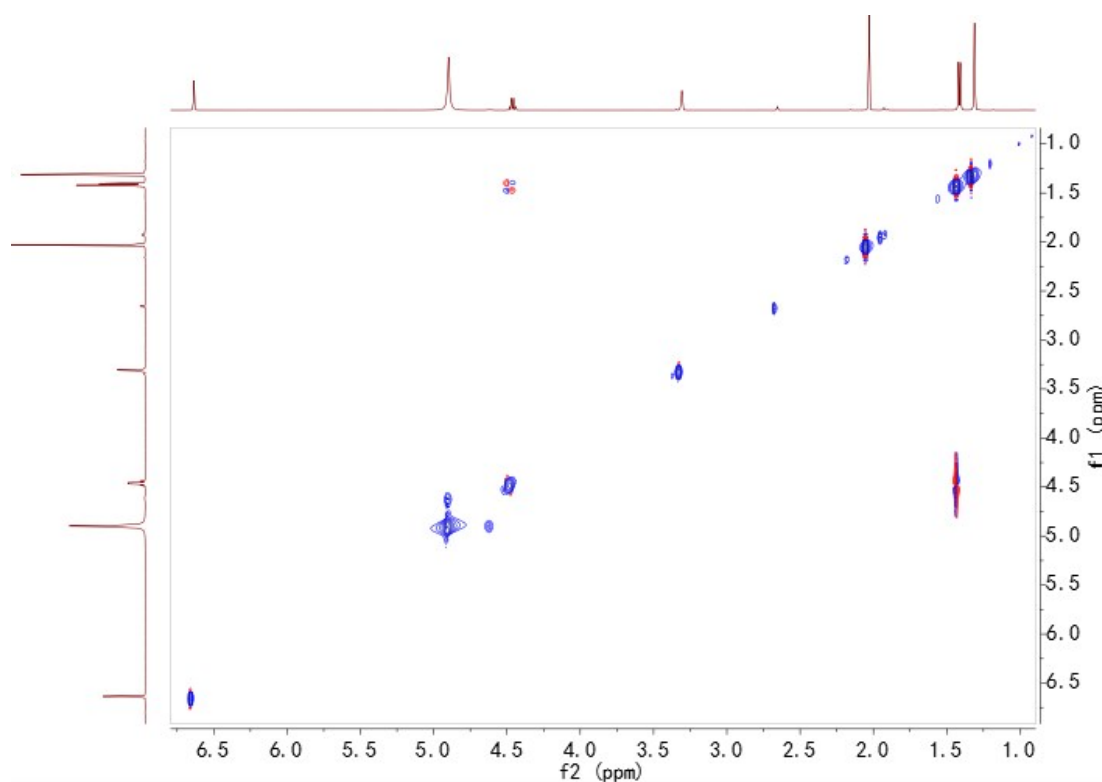

**Figure S16.** Chiral HPLC analysis of compound (+)-**2** and (-)-**2**

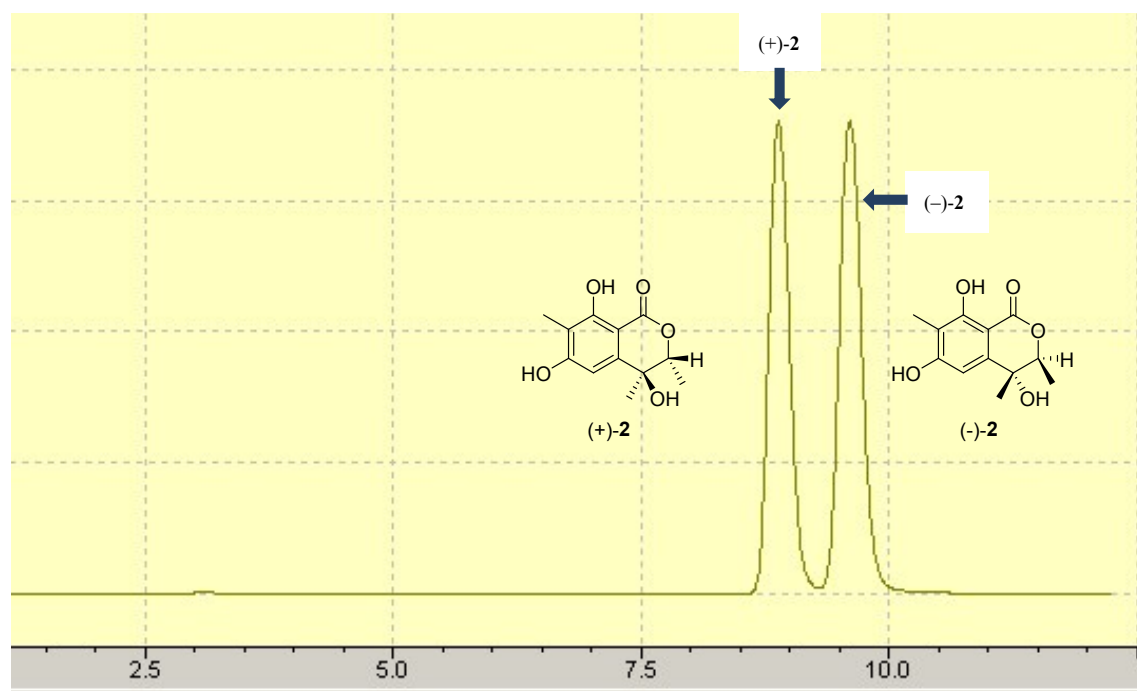

**Figure S17.** HRESIMS spectrum of rhytidhyster A (3)

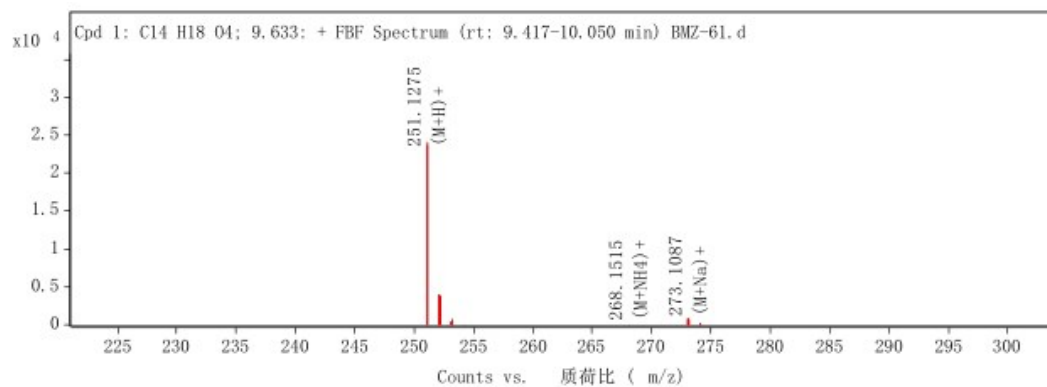

**Figure S18.** <sup>1</sup>H NMR spectrum (400 MHz) of 3 in DMSO-d<sub>6</sub>

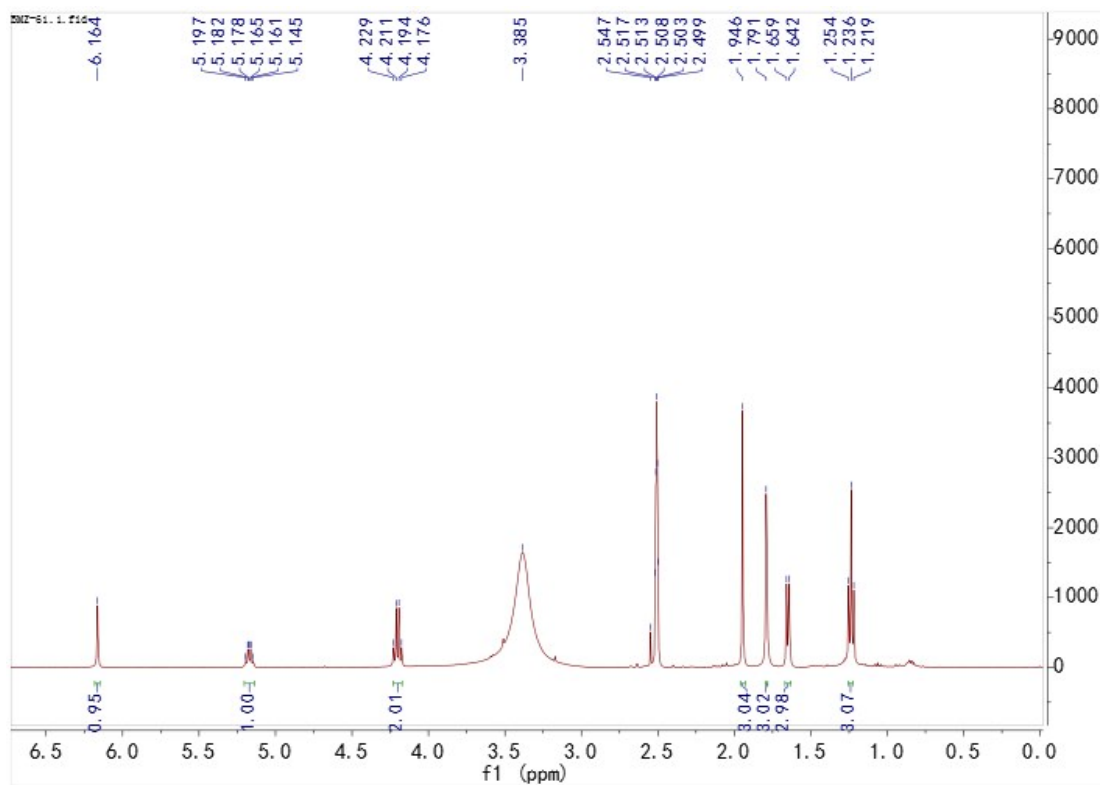

**Figure S19.**  $^{13}\text{C}$  NMR spectrum (1100 MHz) of **3** in  $\text{DMSO-}d_6$

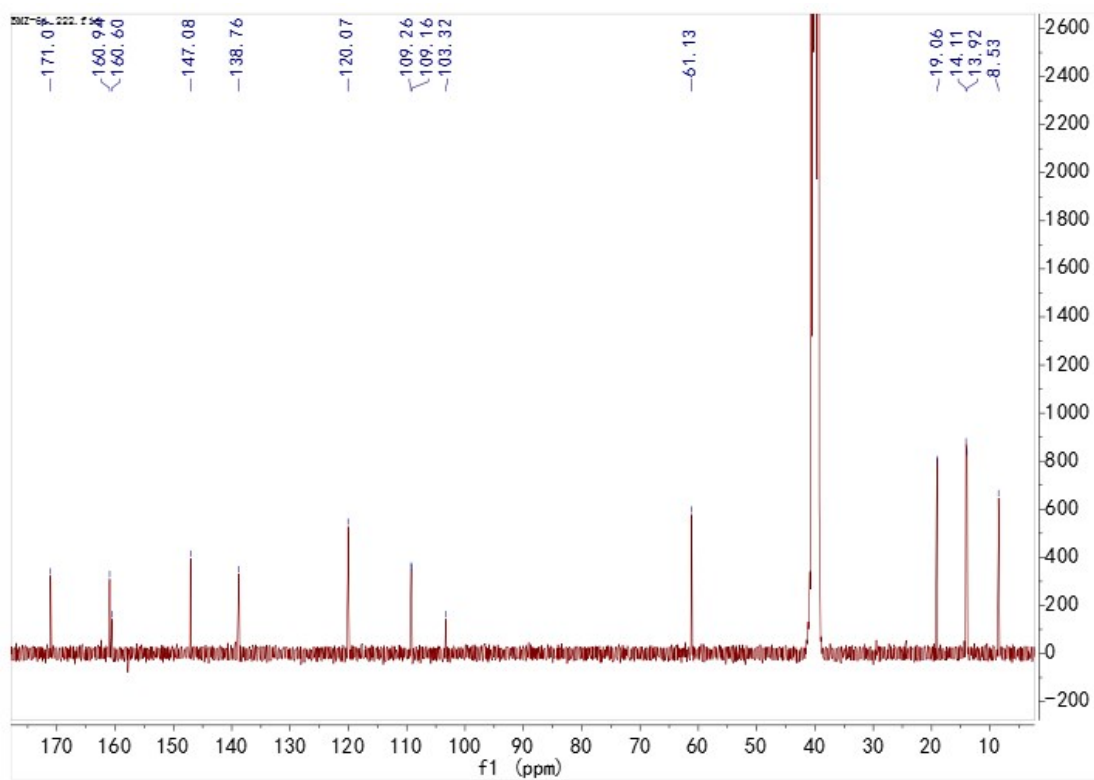

**Figure S20.**  $^1\text{H-}^1\text{H}$  COSY spectrum of **3** in  $\text{DMSO-}d_6$

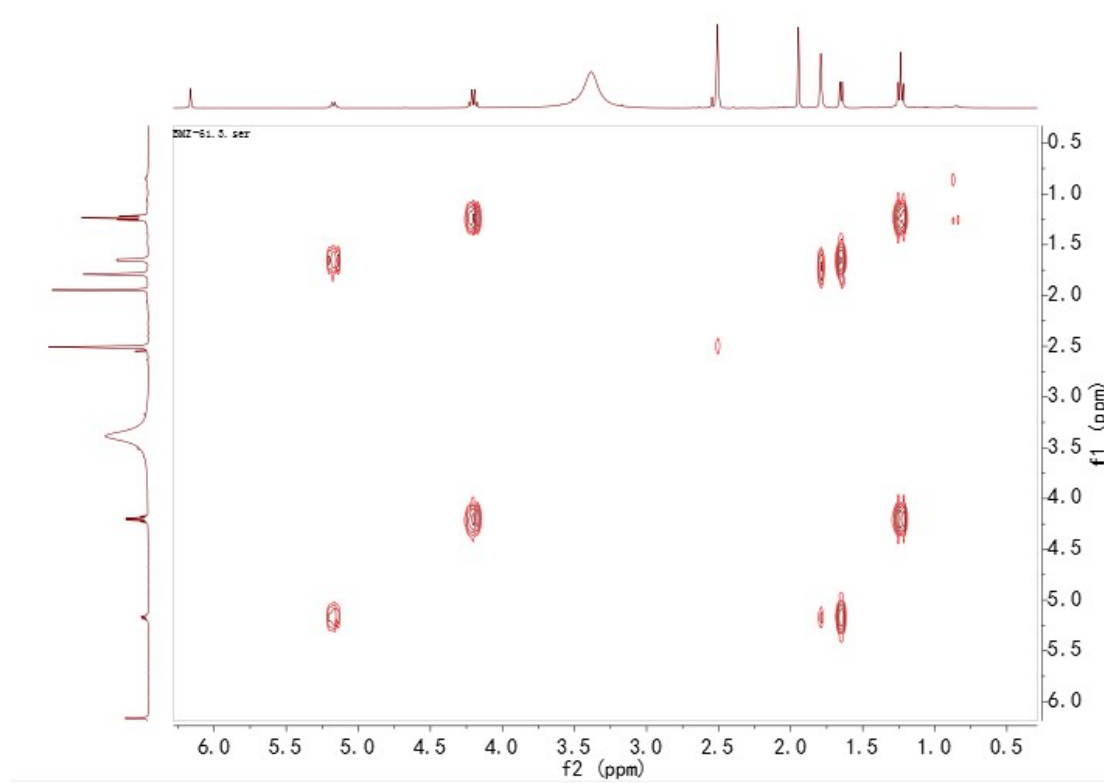

Figure S21. HSQC spectrum of **3** in DMSO- $d_6$

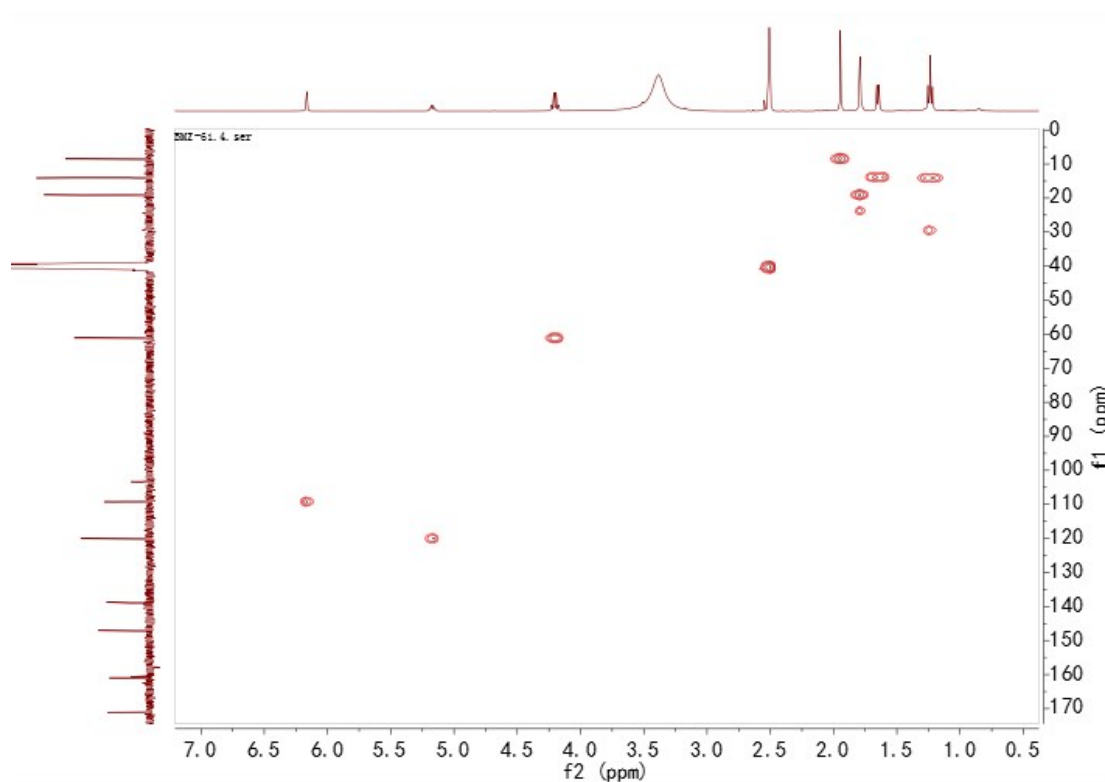

Figure S22. HMBC spectrum of **3** in DMSO- $d_6$

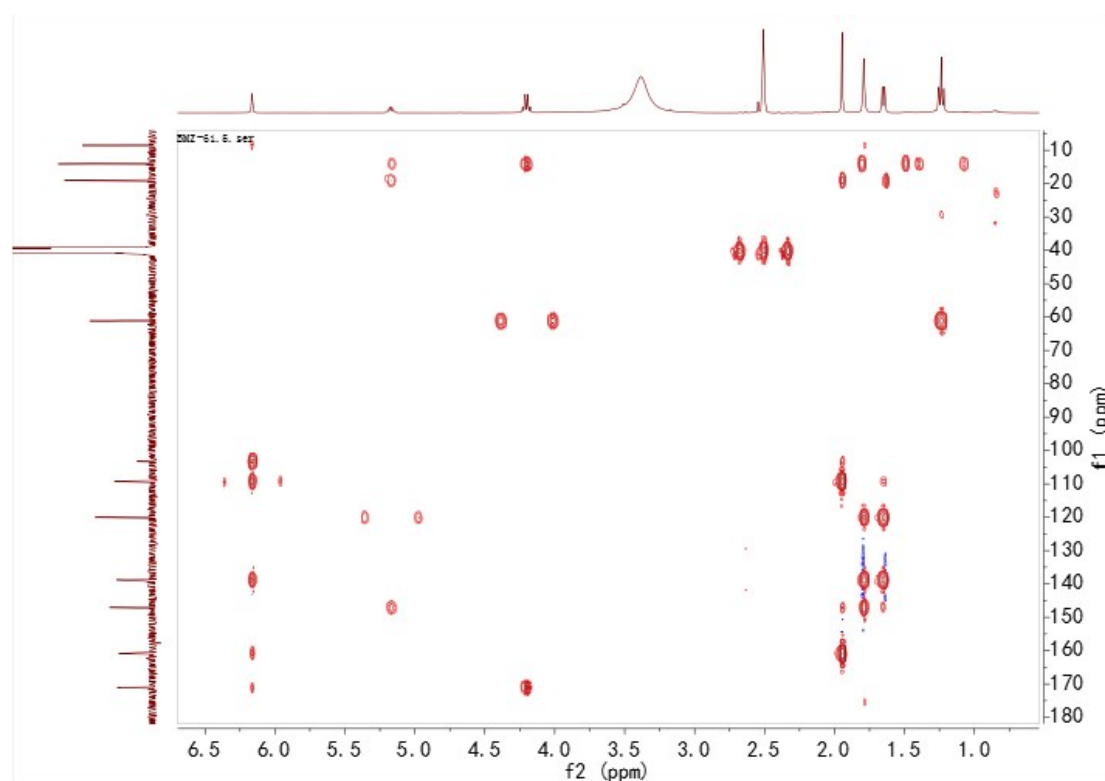

**Figure S23.** ROESY spectrum of **3** in DMSO- $d_6$

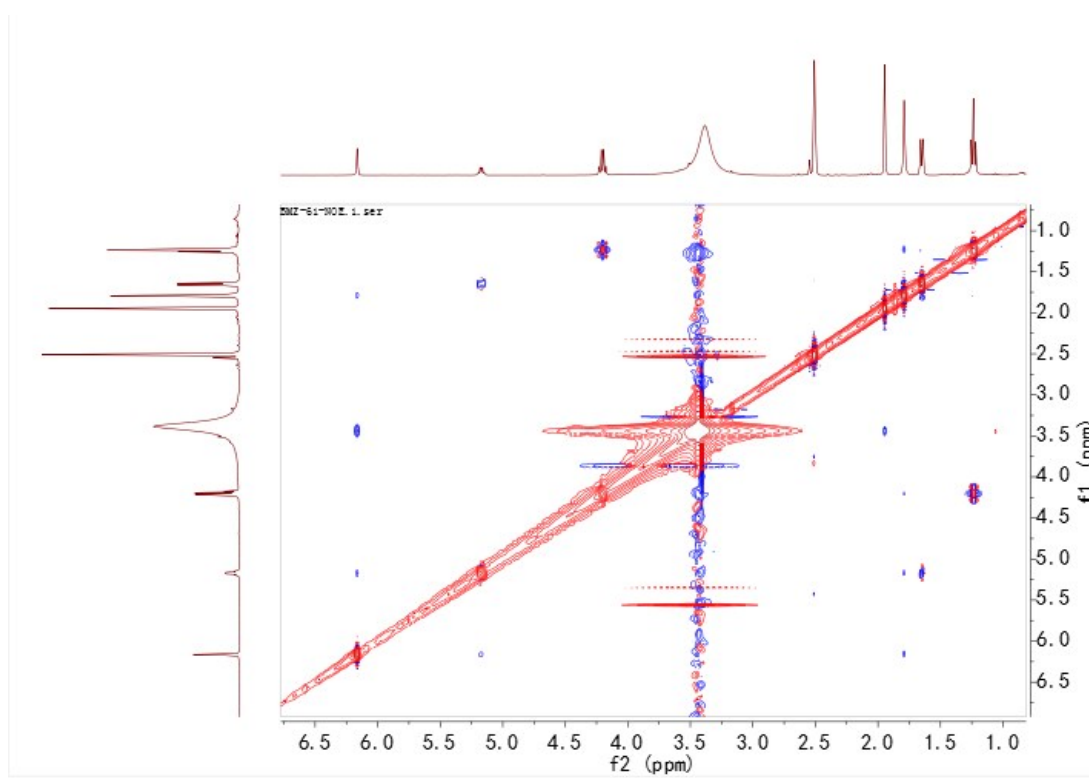

Supplement: d1nj01993g1.pdf [file d1nj01993g1.pdf]
